# Supplementary material
Source: PubMed Central journal article supplement (PMC3890237)
Supplement: NIHMS434500-supplement-1.pdf [file NIHMS434500-supplement-1.pdf]

**Figure S1**

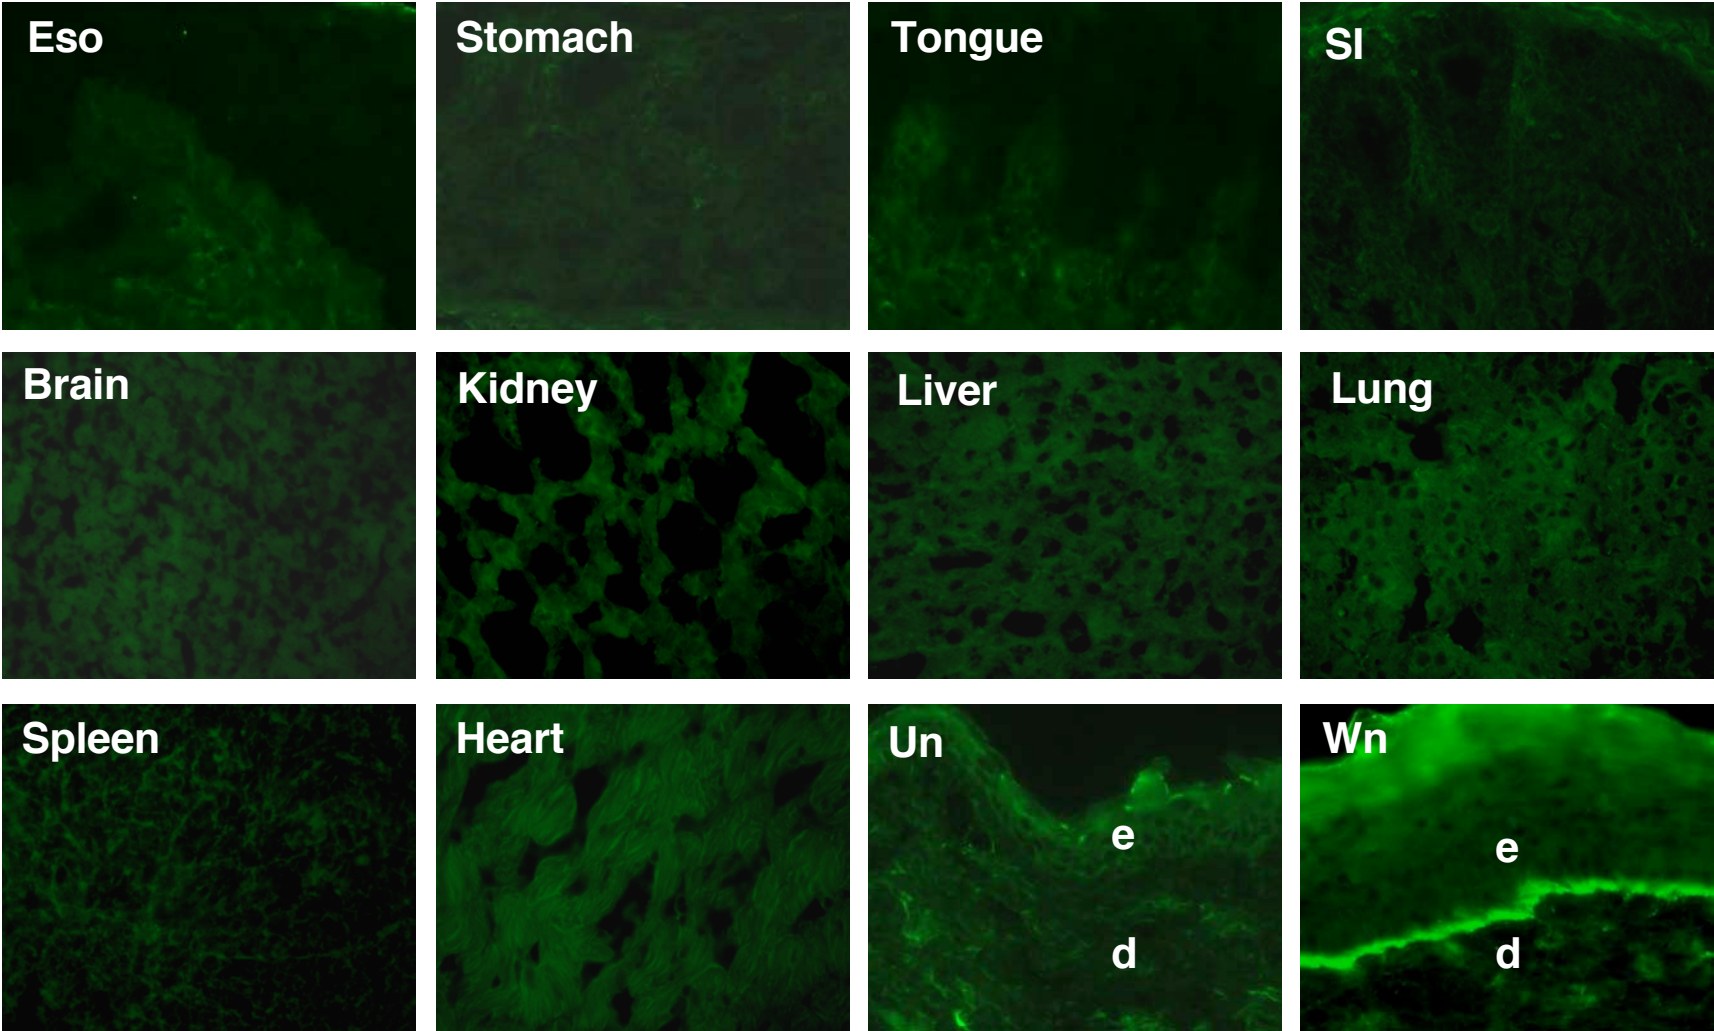

## Figure Legend

**Figure S1. IV injected rC7 does not home to other internal organs.** Tissue distribution of IV injected rC7. Two weeks after IV injection of human 100  $\mu$ g rC7, necropsies were performed on the mice (n = 10 mice) and tissues obtained from esophagus (Eso), stomach, tongue, brain, kidney, liver, lung, spleen, heart, small intestine (SI), unwounded skin (Un) and wounded healed skin (Wn) were subjected to immunostaining using an antibody specific for human C7. Note that IV injected rC7 was readily detected in wounded skin but not in any internal organs or unwounded skin.
